# Supplementary material for: Hydrophoretic high-throughput selection of platelets in physiological shear-stress range
Source: Royal Society of Chemistry journal article supplement (doi:10.1039/c0lc00148a), 2010-11-12
Supplement: C0LC00148A.PDF [file C0LC00148A.PDF]

Supplementary Material (ESI) for Lab on a Chip

This journal is © The Royal Society of Chemistry 2010

## **Hydrophoretic high-throughput selection of platelets in physiological shear-stress range**

Sungyoung Choi,<sup>a</sup> Taeyun Ku,<sup>b</sup> Seungjeong Song,<sup>a</sup> Chulhee Choi<sup>a,b</sup> and Je-Kyun Park<sup>a,c\*</sup>

<sup>a</sup> Department of Bio and Brain Engineering, College of Life Science and Bioengineering, Korea Advanced Institute of Science and Technology (KAIST), 335 Gwahangno, Yuseong-gu, Daejeon 305-701, Republic of Korea.

<sup>b</sup> Graduate School of Medical Science and Engineering, Korea Advanced Institute of Science and Technology (KAIST), 335 Gwahangno, Yuseong-gu, Daejeon 305-701, Republic of Korea

<sup>c</sup> KAIST Institute for the NanoCentury, 335 Gwahangno, Yuseong-gu, Daejeon, 305-701, Republic of Korea.

\* Correspondence should be addressed to J.-K.P. (jekyun@kaist.ac.kr). Phone: +82-42-350-4315.

Fax: +82-42-350-4310.

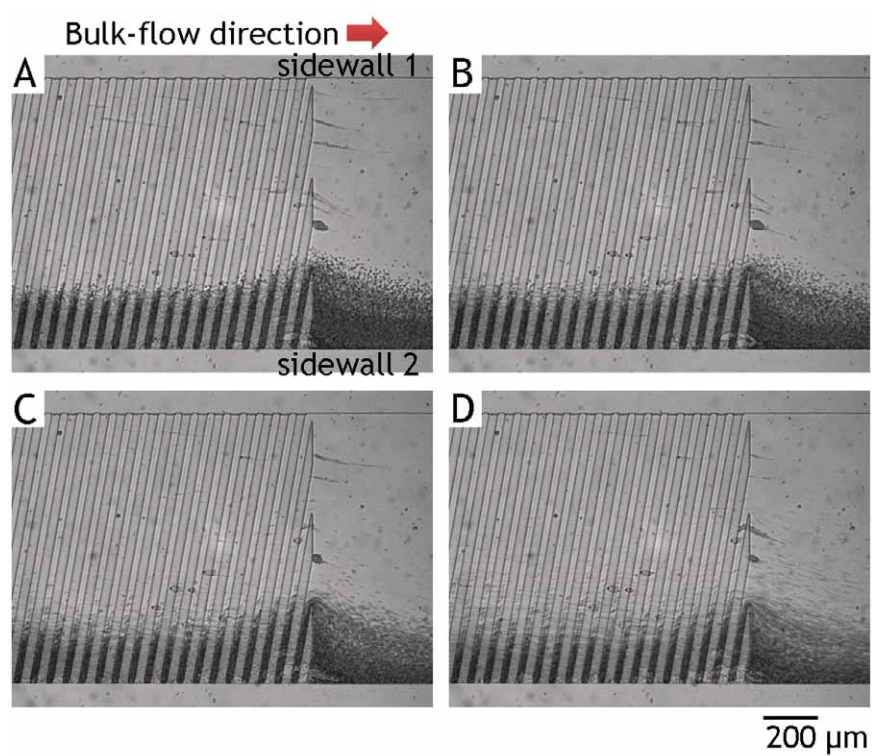

**Fig. S1** Flow-rate independence of hydrophoretic ordering. Red blood cells (RBCs) initially in random distributions are focused to the sidewall 2: (A) for 1  $\mu\text{L min}^{-1}$ , (B) for 5  $\mu\text{L min}^{-1}$ , (C) for 10  $\mu\text{L min}^{-1}$ , and (D) for 20  $\mu\text{L min}^{-1}$ .

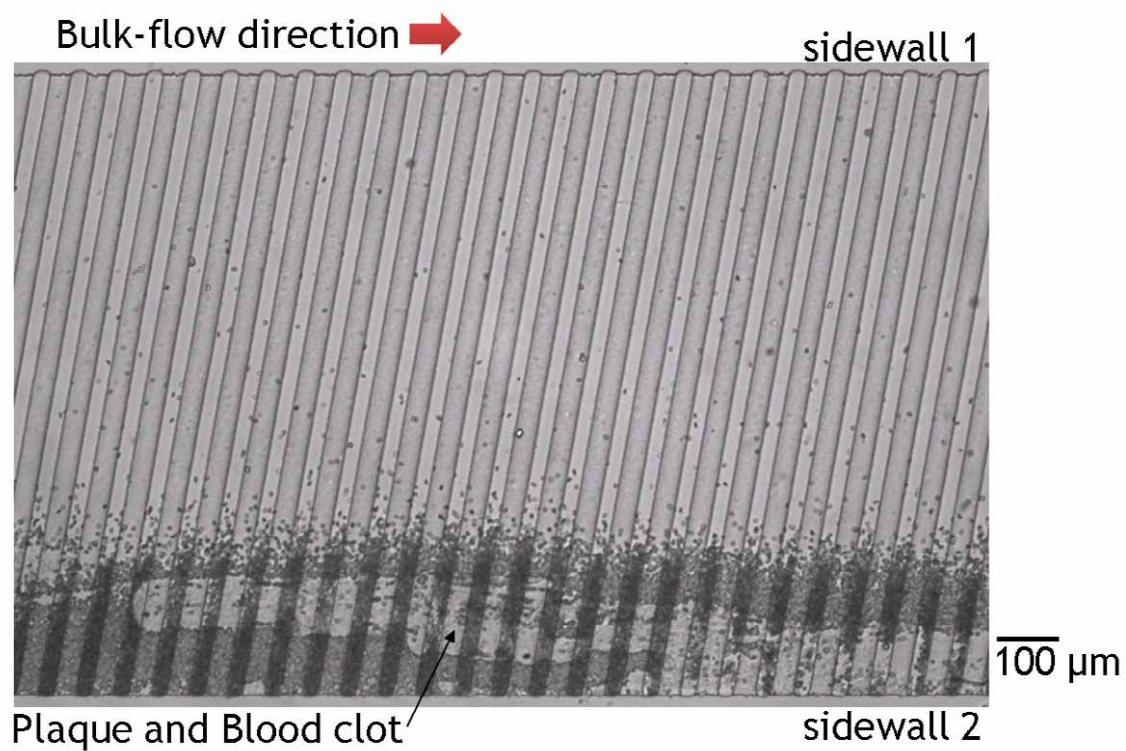

**Fig. S2** Hydrophoretic sorting of plaque and blood clot. Plaques and blood clots move at an angle to the bulk flow and are focused to the sidewall 2.

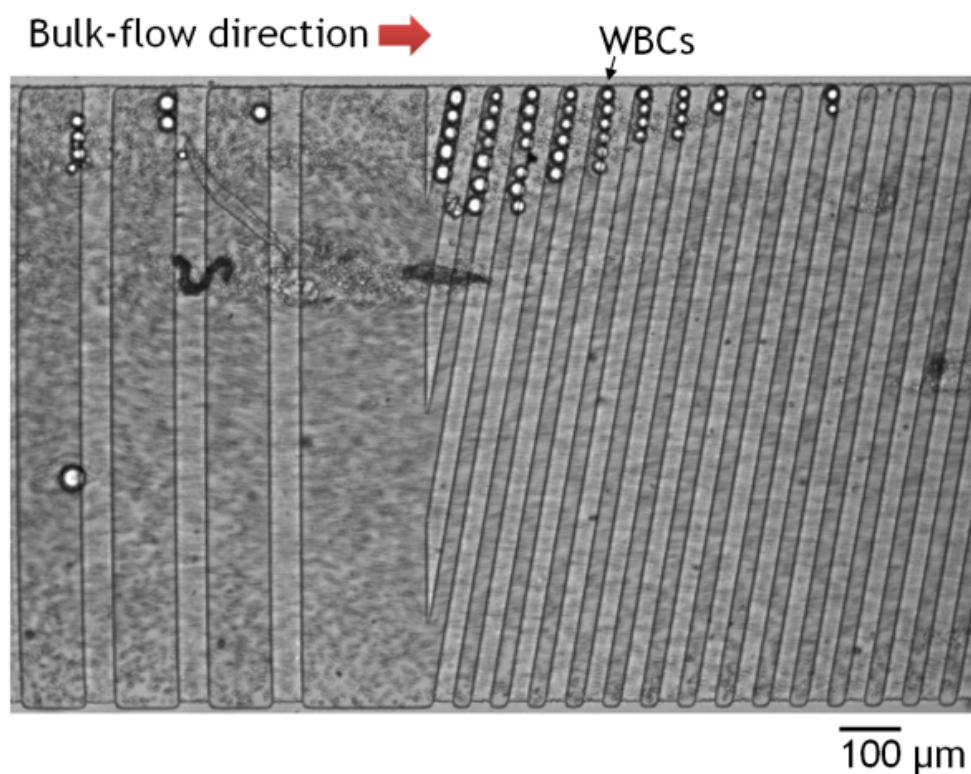

**Fig. S3** White blood cells (WBCs) ( $D > 8 \mu\text{m}$ , where  $D$  is the diameter of the cell) resting in the entrance of the hydrophoresis channel. WBCs are too large to pass through the obstacles. In contrast, smaller WBCs ( $D \leq 8 \mu\text{m}$ ) freely pass through the obstacles and move at an angle to the bulk flow by hydrophoresis. However, the trapped cells did not show any significant disturbance to the separation process.
